# Supplementary material for: Synthesis and characterization of ammonia-responsive polymer microgels
Source: Royal Society of Chemistry journal article supplement (doi:10.1039/c5py01531f), 2015-01-01
Supplement: c5py01531f2.pdf [file c5py01531f2.pdf]

## Electronic Supplementary Information (ESI)

### Synthesis and characterization of ammonia-responsive polymer microgels

Yahui Peng,<sup>a</sup> Xiaomei Jiang,<sup>b</sup> Shoumin Chen,<sup>a</sup> Qingshi Wu,<sup>a</sup> Jing Shen<sup>c</sup> and Weitai Wu<sup>\*a</sup>

<sup>a</sup> *State Key Laboratory for Physical Chemistry of Solid Surfaces, The Key Laboratory for Chemical Biology of Fujian Province, and Department of Chemistry, College of Chemistry and Chemical Engineering, Xiamen University, Xiamen 361005, Fujian, China*

<sup>b</sup> *Clinical Laboratory, Huli Center for Maternal and Child Health, Xiamen 361009, Fujian, China*

<sup>c</sup> *Department of Applied Chemistry, College of Vocational Education, Yunnan Normal University, Kunming 650092, Yunnan, China*

(a)

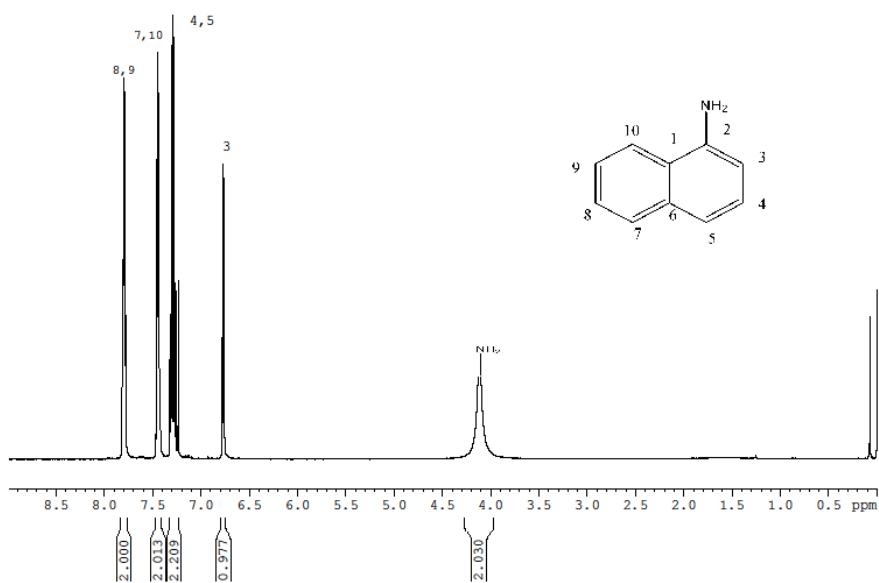

(b)

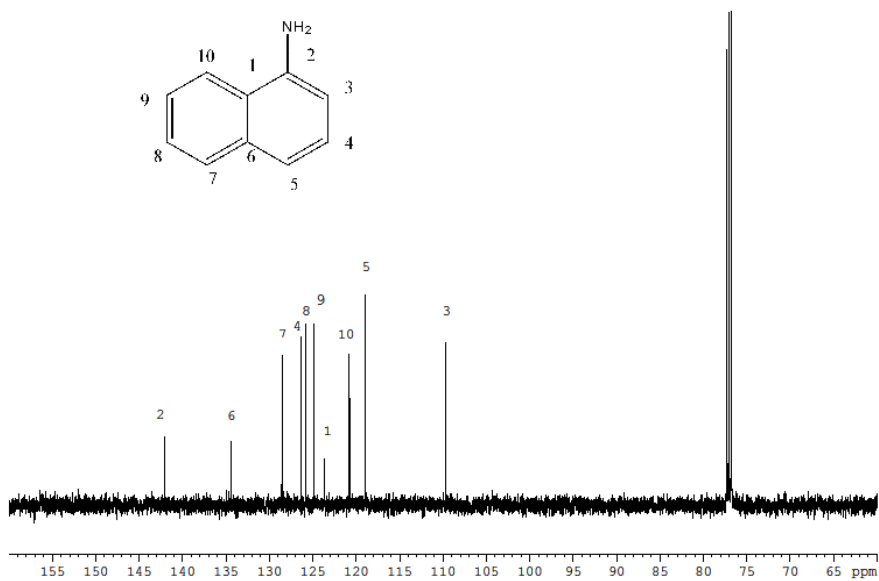

**Fig. S1.** (a) <sup>1</sup>H NMR and (b) <sup>13</sup>C NMR spectra of 1-naphthylamine in CDCl<sub>3</sub>.

(a)

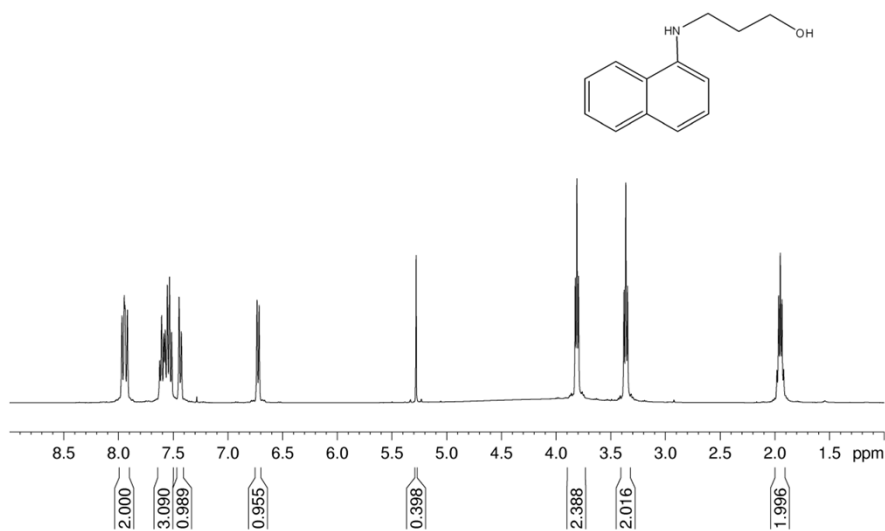

(b)

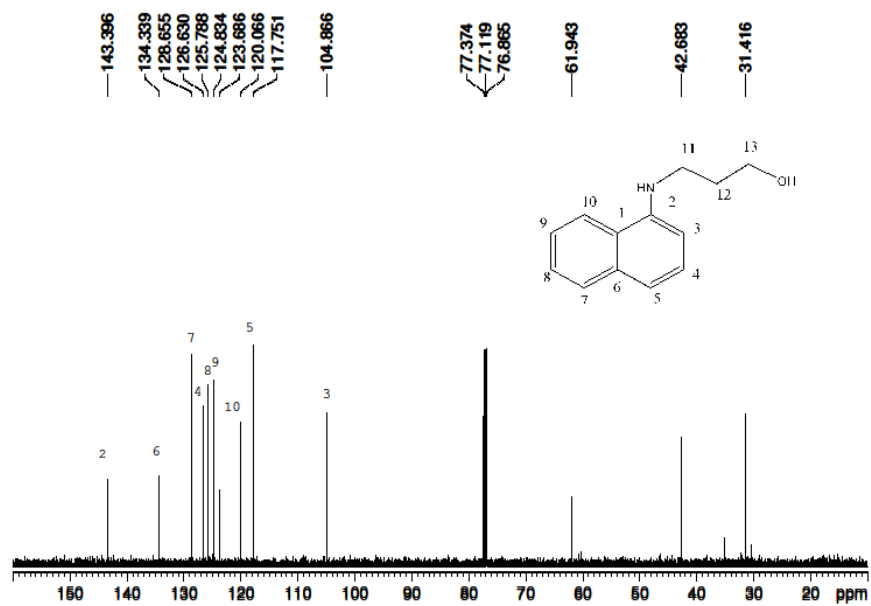

**Fig. S2.** (a)  $^1\text{H}$  NMR and (b)  $^{13}\text{C}$  NMR spectra of the intermediate *N*-(3-hydroxypropyl)-1-naphthylamine in  $\text{CDCl}_3$ .

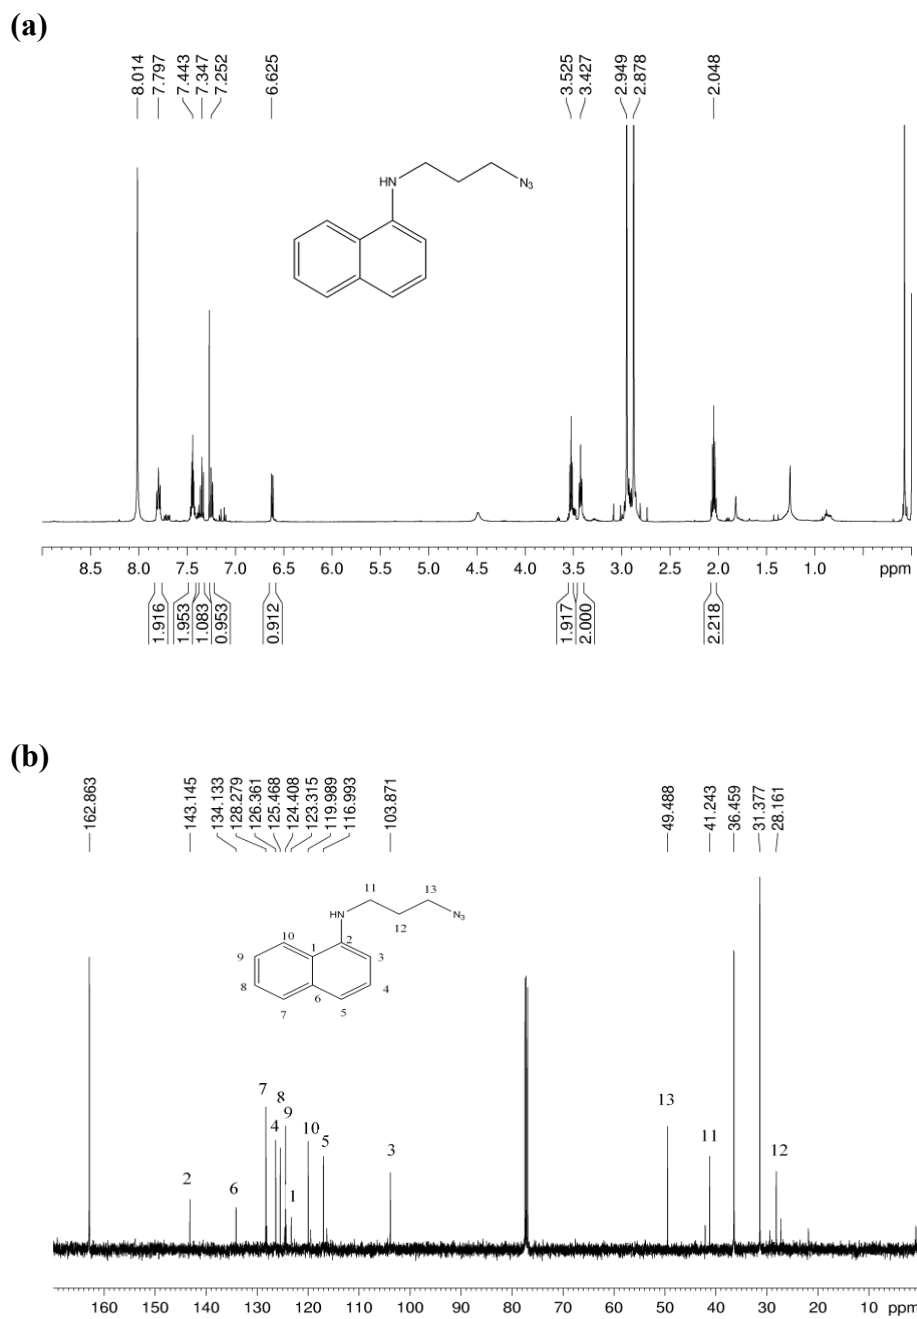

**Fig. S3.** (a)  $^1\text{H}$  NMR and (b)  $^{13}\text{C}$  NMR spectra of *N*-(3-azidopropyl)naphthalen-1-amine in  $\text{CDCl}_3$ .

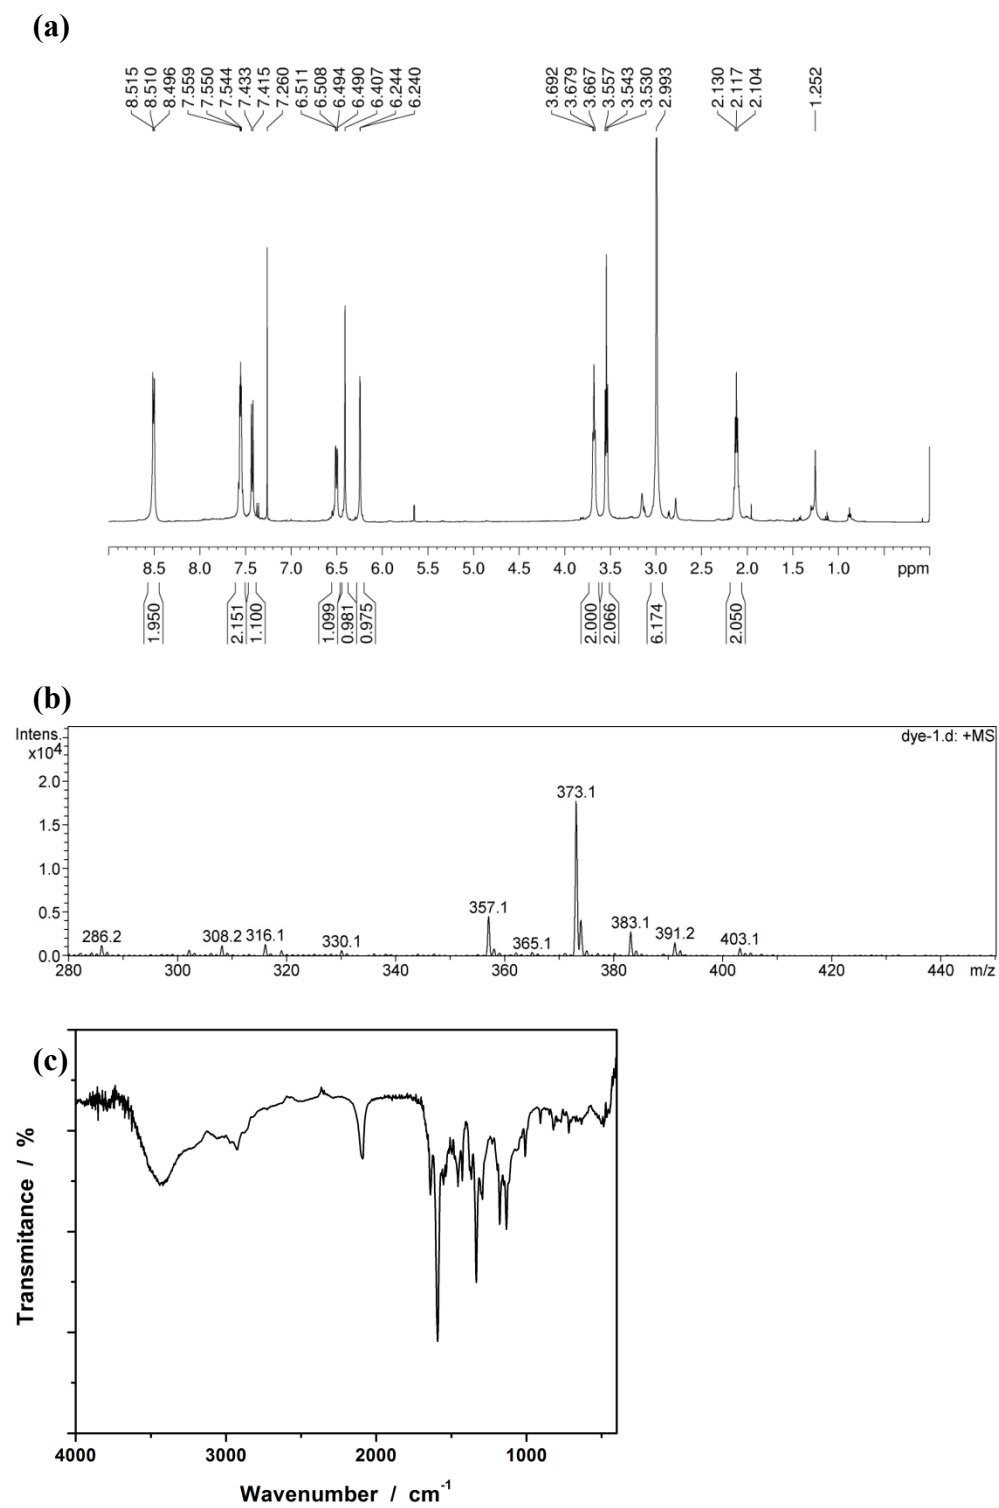

**Fig. S4.** (a)  $^1\text{H}$  NMR (in  $\text{CDCl}_3$ ), (b) ESI-MS, and (c) FTIR spectra of APO.

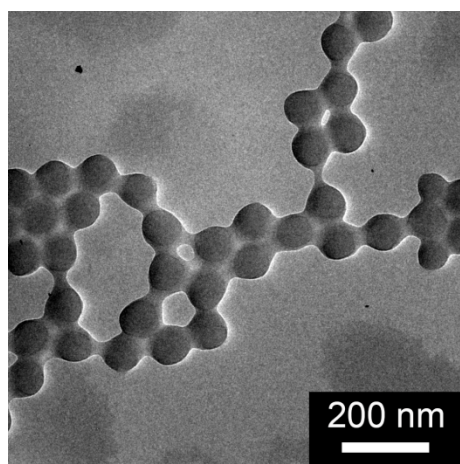

**Fig. S5.** Typical TEM image of the template microgels.

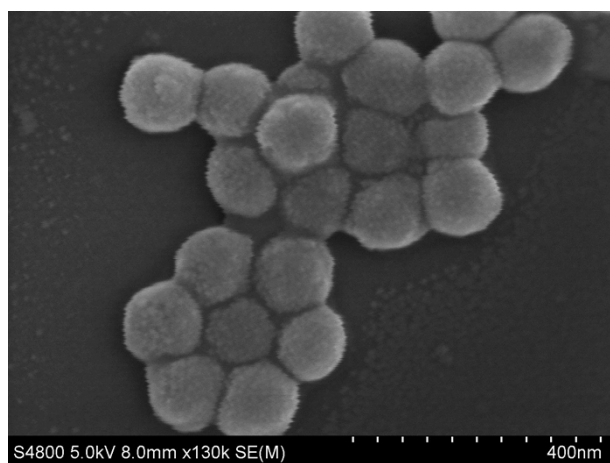

**Fig. S6.** Typical SEM image of the ARM microgels.

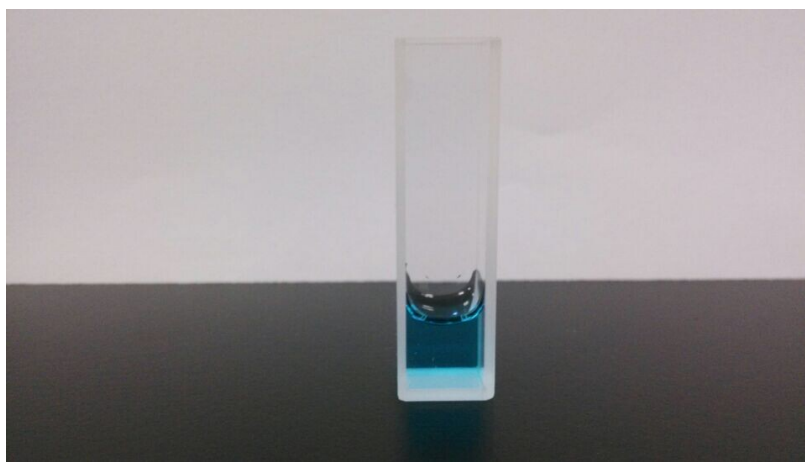

**Fig. S7.** Typical photograph of APO dispersed in aqueous.

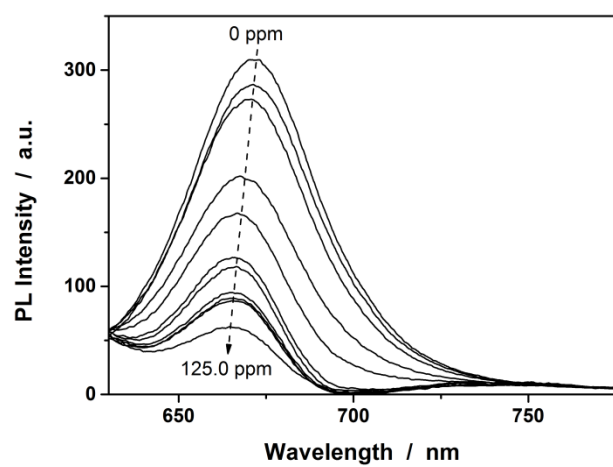

**Fig. S8.** Ammonia-dependent PL spectra of APO dispersed in aqueous.

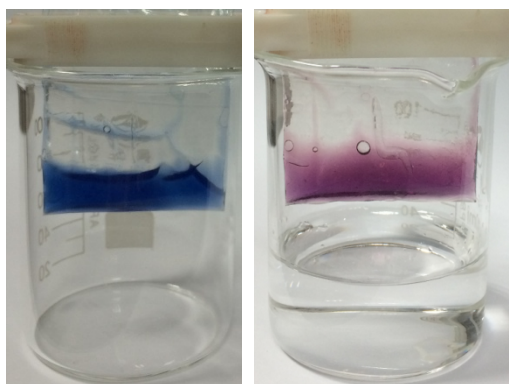

**Fig. S9.** Typical photograph of ARM microgel dispersion in a dialysis tube: (a) without and (b) in the presence of the ammonia vapor.

**Table S1.** Interference Tests on Ammonia Concentration Reading by using ARM Microgels

| constituents                  | concentration | relative error <sup>a</sup> |
|-------------------------------|---------------|-----------------------------|
| acetone                       | 100 ppm       | +0.03%                      |
| methanol                      | 100 ppm       | +0.01%                      |
| ethanol                       | 100 ppm       | +0.01%                      |
| ethane                        | 100 ppm       | +0.02%                      |
| formaldehyde                  | 100 ppm       | +0.02%                      |
| pentane                       | 100 ppm       | +0.01%                      |
| H <sub>2</sub>                | 100 ppm       | +0.01%                      |
| O <sub>2</sub>                | 100 ppm       | +0.01%                      |
| CO                            | 100 ppm       | +0.02%                      |
| CO <sub>2</sub> <sup>b</sup>  | 500 ppm       | -1.47%                      |
|                               | 5%            | -2.31%                      |
| CS <sub>2</sub>               | 100 ppm       | +0.09%                      |
| CH <sub>4</sub>               | 100 ppm       | +0.01%                      |
| H <sub>2</sub> O <sub>2</sub> | 100 ppm       | +0.03%                      |
|                               | 100 ppm       | -0.16%                      |
| H <sub>2</sub> O              | 250 ppm       | -0.16%                      |
|                               | 500 ppm       | -0.17%                      |

<sup>a</sup> “+” and “-” indicate an increase and decrease, respectively, in apparent ammonia concentration related to the actual ammonia concentration.

<sup>b</sup> The atmosphere contains ca. 400ppm CO<sub>2</sub>, and the air we exhale roughly contains 4-5% CO<sub>2</sub>.
